# Supplementary material for: On the mechanical behaviour of a low angle normal fault: the Altotiberina fault (Northern Apennines, Italy) system case study
Source: Copernicus journal article supplement (doi:10.5194/se-2016-48), 2016-03-08
Supplement: Supplementary file [file se-2016-48-AC2-supplement.pdf]

| Model | Model 1 | Model 2 | Model 3 | Model 4A | Model 4B |
|-------|---------|---------|---------|----------|----------|
| WRMS  | 0.85    | 0.30    | 0.53    | 0.19     | 0.20     |

**Table II.** Weighted root mean squares (WRMS) calculations for different models. In Model\_1 all faults are locked; in Model\_2 creeping is simulated only along the ATF considering a (5 km) locking depth; in Model\_3 creeping is simulated only along the GuF, whereas the ATF is considered locked; in Model\_4A creeping behaviour is simulated both along the ATF and GuF and finally in Model\_4B multi-creeping-layers are simulated in the ATF zone.
